# Supplementary material for: Incidence, Risk Factors and Consequences of Emergence Agitation in Adult Patients after Elective Craniotomy for Brain Tumor: A Prospective Cohort Study
Source: PLoS One. 2014 Dec 10;9(12):e114239. doi: 10.1371/journal.pone.0114239 (PMC4262354; doi:10.1371/journal.pone.0114239)
Supplement: S1 Protocol — The protocol for this trial in Chinese version. (PDF) [file pone.0114239.s002.pdf]

[伦理审查申报材料]

# 开颅术后患者躁动的前瞻性研究： 发生率、危险因素和转归

（2011 年 第一版）

首都医科大学附属北京天坛医院重症医学科

2011 年 10 月

## 目 录

一、研究计划书

二、病例报告表

三、研究者简历

四、伦理审查申请表

## 一、研究计划书

# 研究计划书

## 开颅术后患者躁动的前瞻性研究： 发生率、危险因素和转归

（2011 年 第一版）

首都医科大学附属北京天坛医院重症医学科

2011 年 10 月

## 背景

躁动是重症医学热点研究问题之一。有文献报道了急性躁动在内科重症加强医疗病房（ICU）、外科 ICU 和术后恢复室（PACU）患者中的发生率、危险因素和对转归的影响[1-4]。这些研究的结果表明，躁动导致不良转归，包括意外拔管、医院获得性感染、ICU 和住院时间延长。临床经验表明，急性躁动也经常发生于开颅术后患者，且同样会导致不良转归，特别是术后颅内出血[5,6]。然而，到目前为止，对于开颅术后患者的急性躁动，相关研究并不充分。本研究前瞻性纳入开颅术后患者，调查急性躁动的发生率、危险因素及对转归的影响。

# 研究计划

## 一、研究设计

前瞻性队列研究，不干扰和改变现有临床诊疗常规。

## 二、实施单位

首都医科大学附属北京天坛医院神经外科 ICU。

## 三、患者纳入

连续筛查平诊全麻开颅手术后进入 ICU 接受监测治疗的成年患者。

排除标准包括：

1. 年龄小于 18 岁；
2. 急诊手术；
3. 72 小时内再次手术；
4. 术后 24 小时内昏迷；
5. 手术结束到进入 ICU 超过 24 小时。

## 四、躁动的判定

应用 Riker 躁动-镇静量表（SAS）评估患者（附表）[7]。

由 2 名不参与临床护理的护士长每小时评估患者 SAS。2 名研究者复习患者 SAS 评分。这 4 名研究者每天讨论患者 SAS 状况，做出决定。

根据患者术后 12 小时内最高 SAS 评分将患者分为 2 组，躁动组为 SAS 5-7 分，

非躁动组为 SAS 1-4 分。

附表：SAS量表

|   |                     |                                                                                                                                                       |
|---|---------------------|-------------------------------------------------------------------------------------------------------------------------------------------------------|
| 7 | Dangerous agitation | Pulling at ET tube, trying to remove catheters, climbing over bed rail, striking at staff, thrashing side-to-side                                     |
| 6 | Very agitated       | Does not calm, despite frequent verbal reminding of limits; requires physical restraints, biting ET tube                                              |
| 5 | Agitated            | Anxious or mildly agitated, attempting to sit up, calms down to verbal instructions                                                                   |
| 4 | Non-agitated        | Calm and cooperative                                                                                                                                  |
| 3 | Sedated             | Calm, awakens easily, follows commands Difficult to arouse, awakens to verbal stimuli or gentle shaking but drifts off again, follows simple commands |
| 2 | Very sedated        | Arouses to physical stimuli but does not communicate or follow commands may move spontaneously                                                        |
| 1 | Unarousable         | Minimal or no response to noxious stimuli, does not communicate or follow commands                                                                    |

五、危险因素的收集

（一）术前资料：人口学资料（性别、年龄、体重）、吸烟和饮酒史、抗抑郁药或苯二氮卓类药物服用史（超过1个月）、术前住院时间、肿瘤位于额部；

（二）术中资料：额部手术入路、麻醉时间、术中出血量、全凭静脉麻醉（TIVA）。

（三）术后资料：入ICU时格拉斯哥昏迷量表（GCS）、保留气管插管、需要机械通气、脑室外引流管、主诉疼痛、指尖氧饱和度（SpO<sub>2</sub>）低于90%、呼吸频率低于8次/分、平均动脉压高于130 mmHg或低于70 mmHg、血糖低于10 mmol/L。

## 六、转归评价

随访患者至出院。

主要转归指标包括：自行拔除气管插管、意外拔除其他导管。

次要转归指标包括：ICU 停留时间、出院时格拉斯哥转归评分（GOS）。

## 统计学处理

计数资料采用百分比描述，计量资料首先进行正态性检验，正态分布的计量资料用均数±标准差表示，非正态分布的计量资料采用中位数（四分位数）描述，根据 SAS 评分将患者分为躁动组（SAS 5-7 分）和非躁动组（SAS 1-4 分）。计数资料采用卡方检验或 Fisher 精确检验，正态分布计量资料采用 Student T 检验，非正态分布计量资料采用 Mann-Whitney U 检验。然后将单因素分析  $P < 0.20$  的变量引入多因素 logistic 回归分析以确定影响延迟拔管的独立影响因素。所有资料采用 SPSS16.0 统计学软件分析。统计学检验水平为  $P < 0.05$ 。

## 研究进度及样本量

研究预计于 2012 年 7 月至 12 月实施，计划纳入样本量 120 例。

## 免除知情同意书申请

由于本研究不改变现行临床诊疗常规，申请免除签署知情同意书。

## 参考文献

1. Woods JC, Mion LC, Connor JT, et al. Severe agitation among ventilated medical intensive care unit patients: frequency, characteristics and outcomes. *Intensive Care Med* 2004; 30:1066-1072
2. Jaber S, Chanques G, Altairac C, et al. A prospective study of agitation in a medical-surgical ICU: incidence, risk factors, and outcomes. *Chest* 2005; 128:2749-2757
3. Lepouse C, Lautner CA, Liu L, et al. Emergence delirium in adults in the post-anaesthesia care unit. *Br J Anaesth* 2006; 96:747-753
4. Radtke FM, Franck M, Hagemann L, et al. Risk factors for inadequate emergence after anesthesia: emergence delirium and hypoactive emergence. *Minerva Anesthesiol* 2010; 76:394-403
5. Manninen PH, Raman SK, Boyle K, et al. Early postoperative complications following neurosurgical procedures. *Can J Anaesth* 1999; 46:7-14
6. Sutcliffe AJ. Neuroanaesthesia: key points during the perioperative period. *Minerva Anesthesiol* 2003; 69:739-750
7. Riker RR, Picard JT, Fraser GL. Prospective evaluation of the Sedation-Agitation Scale for adult critically ill patients. *Crit Care Med* 1999; 27:1325-1329

## 二、病例报告表

## 项目名称

开颅术后患者躁动的前瞻性研究：发生率、危险因素和转归

---

## 病例报告表

**(Case Report Form)**

姓名缩写：\_\_\_\_\_

住院号：\_\_\_\_\_

CRF 号：\_\_\_\_\_

入组日期： 年 月 日

承担单位：北京天坛医院神经外科 ICU

## 填 表 说 明

1. 所有病例观察表必须由所在中心项目负责人指定人员填写。缩写数据无比真实，应于原始数据资料（即病历）保持一致。
2. 用墨蓝色或黑色圆珠笔或中性笔填写。
3. 病历报告表填写应准确、清晰、不得随意涂改，错误之处纠正时需用横线居中划出，并签署修改姓名拼写缩写及修改时间。
4. 所有选择项目的□内用√标注。
5. 住院号：按照该患者实际住院号填写。
6. 为保护患者隐私，患者姓名不能出现在 CRF 表上。患者姓名缩写四格，根据患者的姓名每个字的首字母靠左边填写；二字姓名填写二字首字母、三字姓名填写三字首字母；四字姓名填写复姓第一个字的首字母。

## 基本资料

| 入选标准: 患者必须符合以下所有标准方可入选研究                                                                                                                                                                                                                                                                                                                                                                                                                                             | 是                        | 否                        |
|----------------------------------------------------------------------------------------------------------------------------------------------------------------------------------------------------------------------------------------------------------------------------------------------------------------------------------------------------------------------------------------------------------------------------------------------------------------------|--------------------------|--------------------------|
| 1. 年龄>18 岁;                                                                                                                                                                                                                                                                                                                                                                                                                                                          | <input type="checkbox"/> | <input type="checkbox"/> |
| 2. 平诊开颅手术后入住 ICU。                                                                                                                                                                                                                                                                                                                                                                                                                                                    | <input type="checkbox"/> | <input type="checkbox"/> |
| 排除标准: 有以下任何特征的患者不能进入研究                                                                                                                                                                                                                                                                                                                                                                                                                                               |                          |                          |
| 1. 年龄小于 18 岁;                                                                                                                                                                                                                                                                                                                                                                                                                                                        | <input type="checkbox"/> | <input type="checkbox"/> |
| 2. 急诊手术;                                                                                                                                                                                                                                                                                                                                                                                                                                                             | <input type="checkbox"/> | <input type="checkbox"/> |
| 3. 72 小时内再次手术;                                                                                                                                                                                                                                                                                                                                                                                                                                                       | <input type="checkbox"/> | <input type="checkbox"/> |
| 4. 术后 24 小时内昏迷;                                                                                                                                                                                                                                                                                                                                                                                                                                                      | <input type="checkbox"/> | <input type="checkbox"/> |
| 5. 手术结束到进入 ICU 超过 24 小时。                                                                                                                                                                                                                                                                                                                                                                                                                                             | <input type="checkbox"/> | <input type="checkbox"/> |
| 一般情况                                                                                                                                                                                                                                                                                                                                                                                                                                                                 |                          |                          |
| 姓名缩写: □□□□<br>病案号: □□□□□□□□<br>ICU 床号: □□□□<br>性别: <input type="checkbox"/> 1 男 <input type="checkbox"/> 2 女<br>年龄:     ____岁<br>身高:     ____cm<br>体重:     ____kg<br>科室:     _____                                                                                                                                                                                                                                                                                   |                          |                          |
| 手术前情况                                                                                                                                                                                                                                                                                                                                                                                                                                                                |                          |                          |
| 抗抑郁药服用史 <input type="checkbox"/> 1 是 <input type="checkbox"/> 2 否    药物名称____服用时间____<br>苯二氮卓类药物服用史 <input type="checkbox"/> 1 是 <input type="checkbox"/> 2 否    药物名称____服用时间____<br>吸烟史 <input type="checkbox"/> 1 是 <input type="checkbox"/> 2 否    如果有吸烟史, ____年, ____支/天<br>饮酒史 <input type="checkbox"/> 1 是 <input type="checkbox"/> 2 否    如果有饮酒史, ____年, ____两/天<br>肿瘤部位 <input type="checkbox"/> 1 额部 <input type="checkbox"/> 2 非额部<br>术前住院时间         ____天 |                          |                          |
| 手术中情况                                                                                                                                                                                                                                                                                                                                                                                                                                                                |                          |                          |
| 额部手术入路 <input type="checkbox"/> 1 是 <input type="checkbox"/> 2 否<br>全凭静脉麻醉 <input type="checkbox"/> 1 是 <input type="checkbox"/> 2 否<br>麻醉时间             ____分钟<br>术中出血量           ____ml                                                                                                                                                                                                                                                                            |                          |                          |
| 入 ICU 时情况                                                                                                                                                                                                                                                                                                                                                                                                                                                            |                          |                          |
| GCS                   E____M____V____<br>气管插管 <input type="checkbox"/> 1 是 <input type="checkbox"/> 2 否<br>机械通气 <input type="checkbox"/> 1 是 <input type="checkbox"/> 2 否<br>脑室外引流管 <input type="checkbox"/> 1 是 <input type="checkbox"/> 2 否                                                                                                                                                                                                                        |                          |                          |

ICU 监测资料

| 项目        | 时间 hour |     |     |     |     |     |     |     |     |     |     |     |     |     |     |
|-----------|---------|-----|-----|-----|-----|-----|-----|-----|-----|-----|-----|-----|-----|-----|-----|
|           | 0       | 1   | 2   | 3   | 4   | 5   | 6   | 7   | 8   | 9   | 10  | 11  | 12  |     |     |
| RR bpm    |         |     |     |     |     |     |     |     |     |     |     |     |     |     |     |
| BP mmHg   |         |     |     |     |     |     |     |     |     |     |     |     |     |     |     |
| SpO2 %    |         |     |     |     |     |     |     |     |     |     |     |     |     |     |     |
| BG mmol/L |         |     |     |     |     |     |     |     |     |     |     |     |     |     |     |
| SAS       |         |     |     |     |     |     |     |     |     |     |     |     |     |     |     |
| GCS E/V/M | / /     | / / | / / | / / | / / | / / | / / | / / | / / | / / | / / | / / | / / | / / | / / |
| 咪达唑仑      |         |     |     |     |     |     |     |     |     |     |     |     |     |     |     |
| 丙泊酚       |         |     |     |     |     |     |     |     |     |     |     |     |     |     |     |
| 芬太尼       |         |     |     |     |     |     |     |     |     |     |     |     |     |     |     |
| 意外 ET     |         |     |     |     |     |     |     |     |     |     |     |     |     |     |     |
| 意外其他 T    |         |     |     |     |     |     |     |     |     |     |     |     |     |     |     |

| SAS 评价标准 |                          |
|----------|--------------------------|
| 7 危险躁动   | 拔管、跨越床栏、辗转翻身、攻击行为        |
| 6 非常躁动   | 无法平静、语言无法劝解、咬气管插管、需要物理约束 |
| 5 躁动     | 烦躁、轻度躁动、试图坐起、语言劝阻有效      |
| 4 无躁动    | 平静合作                     |
| 3 镇静     | 平静易唤醒、遵嘱、对声音有反应          |
| 2 非常镇静   | 物理刺激可唤醒、不遵嘱、可表现为自主运动     |
| 1 无法唤醒   | 对疼痛刺激无反应或反应不足            |

## 转归资料

术后第一天

术后第一天是否脱机

术后第一天是否拔管      ☐1 是      ☐2 否

术后第一天是否转出      ☐1 是      ☐2 否

术后第一天 GCS 评分      E\_\_\_V\_\_\_M\_\_\_

术后 72 小时

术后 72 小时是否转出      ☐1 是      ☐2 否

术后 72 小时是否再手术      ☐1 是      ☐2 否

出院

GOS 评分

☐ 1 死亡

☐ 2 植物状态

☐ 3 重残（生活需要他人辅助）

☐ 4 轻残（生活自理）

☐ 5 恢复良好

观察者签字 \_\_\_\_\_

日期      \_\_\_\_\_年\_\_\_\_月\_\_\_\_日

### 三、研究者简历

首都医科大学附属北京天坛医院医学伦理委员会  
IRB of Beijing Tiantan Hospital Affiliated to Capital Medical University

## 研究者简历

## Resume of Investigator

|                                                                                                                                                                                    |                   |     |                 |
|------------------------------------------------------------------------------------------------------------------------------------------------------------------------------------|-------------------|-----|-----------------|
| 姓名                                                                                                                                                                                 | 周建新               |     |                 |
| 联系方式                                                                                                                                                                               | 67098019          |     |                 |
| 现任职务:                                                                                                                                                                              | 首都医科大学附属北京天坛医院副院长 | 职 称 | 主任医师, 教授, 博士生导师 |
| 单位名称: 首都医科大学附属北京天坛医院重症医疗科                                                                                                                                                          |                   |     |                 |
| 地址(邮编): 天坛西里6号, 100050                                                                                                                                                             |                   |     |                 |
| 教育背景:                                                                                                                                                                              |                   |     |                 |
| 1985.08-1990.07 首都医科大学 医学生                                                                                                                                                         |                   |     |                 |
| 1995.08-2000.03 中国协和医科大学 硕士、博士研究生                                                                                                                                                  |                   |     |                 |
| 工作经历:                                                                                                                                                                              |                   |     |                 |
| 1990.08-1995.07 首都医科大学附属复兴医院 住院医师                                                                                                                                                  |                   |     |                 |
| 2000.04-2002.02 四川大学华西医院 博士后                                                                                                                                                       |                   |     |                 |
| 2002.03-今 首都医科大学附属北京天坛医院 ICU 主任、副院长                                                                                                                                                |                   |     |                 |
| 主要临床研究经验:                                                                                                                                                                          |                   |     |                 |
| 吸入麻醉药作用机理的研究: 发表 SCI 论著 4 篇                                                                                                                                                        |                   |     |                 |
| 神经危重患者的镇痛镇静研究: 发表 SCI 4 篇, 注册临床 RCT 研究 2 项                                                                                                                                         |                   |     |                 |
| 参加 GCP 培训经历:                                                                                                                                                                       |                   |     |                 |
| 否                                                                                                                                                                                  |                   |     |                 |
| 专业协会或组织(最相关的):                                                                                                                                                                     |                   |     |                 |
| 中国医师协会重症医学医师分会副会长、北京医学会危重症医学分会常委                                                                                                                                                   |                   |     |                 |
| 中国医师协会神经外科医师分会神经重症专家委员会主任委员                                                                                                                                                        |                   |     |                 |
| 发表文章(与研究相关的):                                                                                                                                                                      |                   |     |                 |
| 1. <u>Zhou JX</u> , Luo NF, Liang XM, Liu J: The efficacy and safety of intravenous emul isoflurane in rats. Anesthesia and analgesia 2006, 102(1):129-134.                        |                   |     |                 |
| 2. Wang Q, Zheng Y, Lu J, Chen L, Wang GN, <u>Zhou JX</u> : Isoflurane potency in mic the first and second parity. J Am Assoc Lab Anim Sci 2009, 48(6):714-717.                    |                   |     |                 |
| 3. Wang Q, Zheng Y, Lu J, Chen L, Wang J, <u>Zhou JX</u> : Selective breeding of mice s with different sensitivity to isoflurane. Chinese medical journal 2010, 123(10):1315-1319. |                   |     |                 |

研究者签名:

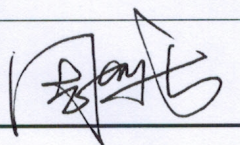

日期:

2011.12.1

#### 四、伦理审查申请表

首都医科大学附属北京天坛医院医学伦理委员会  
IRB of Beijing Tiantan Hospital Affiliated to Capital Medical University

## 伦理审查申请表

## Ethical Review Application Form

|                   |                                                                                                                                                                                                                                                                                                                                    |
|-------------------|------------------------------------------------------------------------------------------------------------------------------------------------------------------------------------------------------------------------------------------------------------------------------------------------------------------------------------|
| 一、项目概况            |                                                                                                                                                                                                                                                                                                                                    |
| 项目名称              | 开颅术后患者急性躁动的发生率、危险因素及转归的临床研究                                                                                                                                                                                                                                                                                                        |
| 申办者               | 首都医科大学附属北京天坛医院重症医学科                                                                                                                                                                                                                                                                                                                |
| 临床研究组长单位          | 首都医科大学附属北京天坛医院                                                                                                                                                                                                                                                                                                                     |
| 临床研究参加单位          |                                                                                                                                                                                                                                                                                                                                    |
| 我院承担科室            | 首都医科大学附属北京天坛医院重症医学科                                                                                                                                                                                                                                                                                                                |
| 我院主要研究者           | 周建新                                                                                                                                                                                                                                                                                                                                |
| 我院研究者与研究助理        | 周建新、陈律                                                                                                                                                                                                                                                                                                                             |
| 二、研究摘要            |                                                                                                                                                                                                                                                                                                                                    |
| 研究设计(可多选)         | <input type="checkbox"/> 病例对照研究 <input checked="" type="checkbox"/> 队列研究 <input type="checkbox"/> 横断面研究 <input type="checkbox"/> 非随机对照研究<br><input type="checkbox"/> 随机对照研究 <input type="checkbox"/> 应用盲法 <input type="checkbox"/> 其他:                                                                                             |
| 研究背景和目的           | 对于神经外科术后患者,躁动发生率和危险因素,相关研究不足                                                                                                                                                                                                                                                                                                       |
| 样本量、统计分析          | 纳入 120 例患者,根据术后 12 小时 SAS 评分分为躁动组和非躁动组,进行危险因素和转归的统计学分析                                                                                                                                                                                                                                                                             |
| 拟研究时间             | 2012 年 7 月 1 日至 2012 年 12 月 31 日                                                                                                                                                                                                                                                                                                   |
| 三、受试者招募、费用和补偿     |                                                                                                                                                                                                                                                                                                                                    |
| 谁负责招募<br>(可多选)    | <input checked="" type="checkbox"/> 项目负责人 <input type="checkbox"/> 研究者 <input type="checkbox"/> 医生 <input type="checkbox"/> 护士 <input type="checkbox"/> 其他: _____                                                                                                                                                                  |
| 使用招募材料            | <input checked="" type="checkbox"/> 否 <input type="checkbox"/> 是 → 请提交审查                                                                                                                                                                                                                                                           |
| 与研究有关的<br>医疗检查与治疗 | <input checked="" type="checkbox"/> 免费 <input type="checkbox"/> 部分免费 <input type="checkbox"/> 不免费                                                                                                                                                                                                                                  |
| 四、主要研究者<br>责任声明   | <p>我将遵循我国法律法规和国际伦理准则以及伦理委员会的要求,开展本项研究:</p> <ul style="list-style-type: none"> <li>● 在审查批件失效期前提交跟踪审查申请报告;</li> <li>● 进行方案修改时要报告伦理委员会,获得批准后执行(注:为避免对受试者紧急伤害的修正方案等可以先执行,然后及时报告);</li> <li>● 及时报告严重不良事件和影响风险与受益比的非预期不良事件;</li> <li>● 及时报告提前终止研究、或其他伦理委员会的重要决定;</li> <li>● 随时应伦理委员会的要求,报告正在进行的研究的有关信息;</li> <li>● 提交最后的结题报告。</li> </ul> |
| 主要研究者签字           | 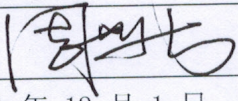                                                                                                                                                                                                                                                |
| 日期                | 2011 年 12 月 1 日                                                                                                                                                                                                                                                                                                                    |
